# Supplementary material for: A Genome-Wide Association Study for Fumonisin Contamination Resistance in Tropical Maize
Source: Research Square preprint supplement (doi:10.21203/rs.3.rs-728701/v1), 2021-07-30
Supplement: Supplementary file 1 [file ab79a2cf0d288718a03d903b.xlsx]

## Sheet: Planilha3
A Genome-Wide Association Study for Fumonisin Contamination Resistance in Tropical Maize.
Euphytica
Karla Jorge Silva, Claudia Teixeira Guimarães, Sylvia Morais de Sousa Tinoco, Karine da Costa Bernardino, Roberto dos Santos Trindade, Valéria Aparecida Vieira Queiroz, Renata Regina Pereira da Conceição, José Henrique Soler Guilhen, Natanael Tavares de Oliveira, Cynthia Maria Borges Damasceno, Roberto Willians Noda, Luiz Antônio dos Santos Dias, Lauro José Moreira Guimarães, Janaína de Oliveira …
*Corresponding author (marta.pastina@embrapa.br)1Universidade Federal de Viçosa (UFV), Viçosa – MG, Brazil.
Embrapa Milho e Sorgo, Rodovia MG 424, km 45, Zona Rural, 35701970 - Sete Lagoas, MG - Brazil.
Fequencies of alleles related to fumonisin resistance estimated for nine QTLs
Snp position	Chr	Pos	Obs	Allele	Estimate	Frequency alelic heterozygotos	Frequency alelic homozygotos
S2_107722317	2	107722317	163	A	12112	0.83	0.8
S2_107722317	2	107722317	26	G	-0.45757	0.17	0.13
S2_107722317	2	107722317	16	R	0
S2_107796371	2	107796371	39	A	0.04354	0.2	0.19
S2_107796371	2	107796371	161	G	151058	0.8	0.79
S2_107796371	2	107796371	5	R	0
S2_107916244	2	107916244	50	C	0.41988	0.26	0.24
S2_107916244	2	107916244	150	T	169637	0.74	0.73
S2_107916244	2	107916244	5	Y	0
S2_208043665	2	208043665	162	C	228605	0.82	0.79
S2_208043665	2	208043665	32	T	117085	0.18	0.16
S2_208043665	2	208043665	11	Y	0
S3_176849366	3	176849366	78	A	182235	0.4	0.38
S3_176849366	3	176849366	118	G	262308	0.6	0.58
S3_176849366	3	176849366	9	R	0
S4_36074048	4	36074048	85	A	-17175	0.43	0.41
S4_36074048	4	36074048	112	G	-0.51866	0.57	0.55
S4_36074048	4	36074048	8	R	0
S4_150737434	4	150737434	40	A	-2181	0.21	0.2
S4_150737434	4	150737434	157	G	-0.68063	0.79	0.77
S4_150737434	4	150737434	8	R	0
S5_1040337	5	1040337	180	C	0.83078	0.89	0.88
S5_1040337	5	1040337	21	T	-10777	0.11	0.1
S5_1040337	5	1040337	4	Y	0
S5_3327619	5	3327619	121	C	-0.17544	0.65	0.59
S5_3327619	5	3327619	61	G	112515	0.35	0.3
S5_3327619	5	3327619	23	S	0
S5_4305165	5	4305165	42	C	0.01714	0.23	0.2
S5_4305165	5	4305165	152	G	-13278	0.77	0.74
S5_4305165	5	4305165	11	S	0
S5_7711053	5	7711053	149	C	103473	0.75	0.73
S5_7711053	5	7711053	47	T	-0.44287	0.25	0.23
S5_7711053	5	7711053	9	Y	0
S5_176079031	5	176079031	150	A	-0.98908	0.76	0.73
S5_176079031	5	176079031	44	G	-23357	0.24	0.21
S5_176079031	5	176079031	11	R	0
S10_14451414	10	14451414	53	A	-23791	0.28	0.26
S10_14451414	10	14451414	144	G	-12081	0.72	0.7
S10_14451414	10	14451414	8	R	0
S10_80000933	10	80000933	150	G	-14939	0.76	0.73
S10_80000933	10	80000933	45	T	-2785	0.24	0.22
S10_80000933	10	80000933	10	K	0
S10_80000952	10	80000952	50	A	-30052	0.27	0.24
S10_80000952	10	80000952	146	G	-16736	0.73	0.71
S10_80000952	10	80000952	9	R	0
